# Supplementary material for: Kinetic and mechanistic study of the reaction between methane sulfonamide (CH 3 S(O) 2 NH 2 ) and OH
Source: Copernicus journal article supplement (doi:10.5194/acp-20-2695-2020), 2020-03-04
Supplement: Supplementary file 1 [file acp-20-2695-2020-supplement.pdf]

Supplement of Atmos. Chem. Phys., 20, 2695–2707, 2020  
<https://doi.org/10.5194/acp-20-2695-2020-supplement>  
© Author(s) 2020. This work is distributed under  
the Creative Commons Attribution 4.0 License.

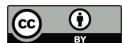

*Supplement of*

## **Kinetic and mechanistic study of the reaction between methane sulfonamide ( $\text{CH}_3\text{S}(\text{O})_2\text{NH}_2$ ) and OH**

**Matias Berasategui et al.**

*Correspondence to:* John N. Crowley ([john.crowley@mpic.de](mailto:john.crowley@mpic.de))

The copyright of individual parts of the supplement might differ from the CC BY 4.0 License.

**Table S1.** Experimental and calculated vibrational wavenumbers for the dimer of CH<sub>3</sub>SO<sub>2</sub>NH<sub>2</sub>.

| mode                              | IR Gas <sup>a</sup> | Frequencies (cm <sup>-1</sup> ) <sup>a,b</sup> |              |       | Mode description              |
|-----------------------------------|---------------------|------------------------------------------------|--------------|-------|-------------------------------|
|                                   |                     | 6-31++G(d,p)                                   | Aug-CC-pVTZ  | ratio |                               |
| v <sub>1</sub> , v <sub>2</sub>   | 3362 (18.1)         | 3599 (21.3)                                    | 3531 (17.8)  | 0.952 | NH <sub>2</sub> asym. stretch |
| v <sub>3</sub>                    | 3266 (100)          | 3393 (100.0)                                   | 3326 (100.0) | 0.982 | NH <sub>2</sub> sym. stretch  |
| v <sub>4</sub>                    |                     | 3373 (<0.1)                                    | 3304 (0.2)   |       | NH <sub>2</sub> sym. stretch  |
| v <sub>5</sub> , v <sub>6</sub>   |                     | 3192 (<0.1)                                    | 3131 (<0.1)  |       | CH <sub>3</sub> deformation   |
| v <sub>7</sub> , v <sub>8</sub>   | 3030 (1.3)          | 3185 (0.1)                                     | 3124 (<0.1)  | 0.970 | CH <sub>3</sub> asym. stretch |
| v <sub>9</sub> , v <sub>10</sub>  | 2940 (0.7)          | 3079 (0.1)                                     | 3029 (<0.1)  | 0.971 | CH <sub>3</sub> sym. stretch  |
| v <sub>11</sub>                   |                     | 1619 (1.0)                                     | 1610 (0.5)   |       | NH <sub>2</sub> bend          |
| v <sub>12</sub>                   | 1557 (4.2)          | 1610 (4.1)                                     | 1604 (2.8)   | 0.971 | NH <sub>2</sub> bend          |
| v <sub>13</sub> , v <sub>14</sub> |                     | 1461 (0.7)                                     | 1461 (0.8)   |       | CH <sub>3</sub> rocking       |
| v <sub>15</sub> , v <sub>16</sub> | 1419 (0.7)          | 1460 (1.0)                                     | 1461 (0.6)   | 0.971 | CH <sub>3</sub> asym. bend    |
| v <sub>17</sub> , v <sub>18</sub> |                     | 1364 (1.6)                                     | 1358 (1.4)   |       | CH <sub>3</sub> umbrella      |
| v <sub>19</sub>                   |                     | 1306 (16.7)                                    | 1273 (13.9)  |       | SO <sub>2</sub> asym. stretch |
| v <sub>20</sub>                   | 1326 (36.9)         | 1299 (41.1)                                    | 1267 (34.4)  | 1.047 | SO <sub>2</sub> asym. stretch |
| v <sub>21</sub>                   | 1216 (2.0)          | 1135 (3.3)                                     | 1128 (3.6)   | 1.078 | NH <sub>2</sub> rocking       |
| v <sub>22</sub>                   |                     | 1125 (2.0)                                     | 1122 (4.0)   |       | NH <sub>2</sub> rocking       |
| v <sub>23</sub>                   | 1157 (22.9)         | 1114 (26.2)                                    | 1084 (22.5)  | 1.065 | SO <sub>2</sub> sym. stretch  |
| v <sub>24</sub>                   | 1105 (3.4)          | 1092 (5.3)                                     | 1061 (4.5)   | 1.041 | SO <sub>2</sub> sym. stretch  |
| v <sub>25</sub>                   |                     | 1000 (2.0)                                     | 997 (2.0)    |       | CH <sub>3</sub> wagging       |
| v <sub>26</sub>                   | 989 (4.1)           | 998 (4.1)                                      | 994 (4.0)    | 0.995 | CH <sub>3</sub> wagging       |
| v <sub>27</sub> , v <sub>28</sub> |                     | 985 (0.3)                                      | 985 (0.2)    |       | CH <sub>3</sub> twisting      |
| v <sub>29</sub>                   |                     | 916 (9.0)                                      | 906 (7.1)    |       | C-S stretch                   |
| v <sub>30</sub>                   | 885 (1.4)           | 894 (12.3)                                     | 888 (10.6)   | 0.997 | C-S stretch                   |
| v <sub>31</sub>                   | 773 (3.8)           | 738 (19.5)                                     | 736 (20.7)   | 1.050 | NH <sub>2</sub> wagging       |

736 (<0.1), v<sub>32</sub>; 705 (2.0), v<sub>33</sub>; 695 (12.1), v<sub>34</sub>; 491 (4.3), v<sub>35</sub>; 489 (3.4), v<sub>36</sub>; 465 (3.7), v<sub>37</sub>; 464 (<0.1), v<sub>38</sub>; 424 (<0.1), v<sub>39</sub>; 420 (1.2), v<sub>40</sub>; 358 (0.4), v<sub>41</sub>; 355 (2.3), v<sub>42</sub>; 302 (0.5), v<sub>43</sub>; 302 (2.4), v<sub>44</sub>; 291 (0.1), v<sub>45</sub>; 289 (0.1), v<sub>46</sub>; 225 (0.3), v<sub>47</sub>; 224 (<0.1), v<sub>48</sub>; 139 (2.0), v<sub>49</sub>; 117 (0.1), v<sub>50</sub>; 98 (<0.1), v<sub>51</sub>; 41 (0.4), v<sub>52</sub>; 32 (1.2), v<sub>53</sub>; 25 (<0.1), v<sub>54</sub>.<sup>b</sup>

a) Relative absorbance at band maximum in parentheses.  
b) Calculated using the B3LYP method.

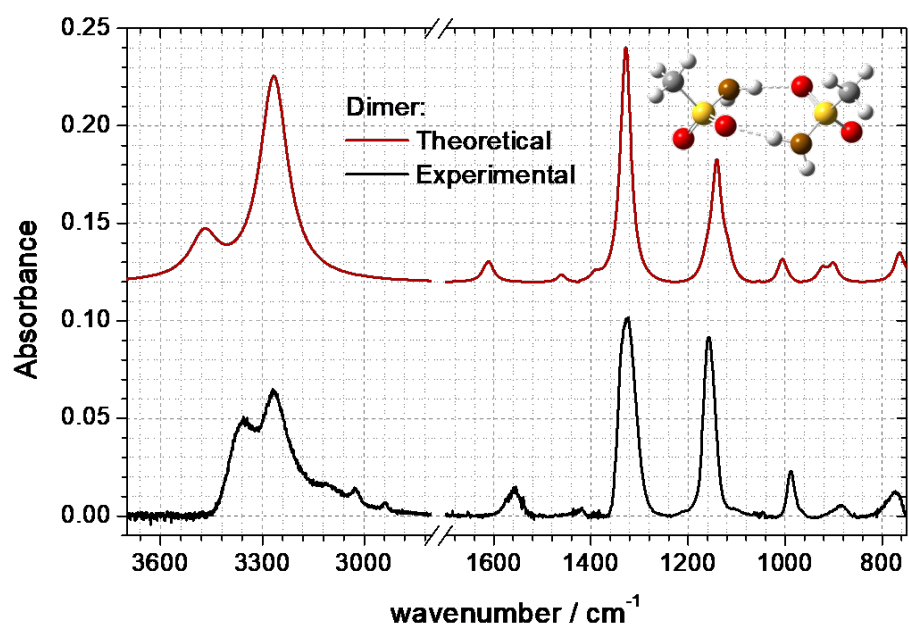

**Figure S1.** Comparison of the experimental spectrum of the MSAM-dimer (black line, after the subtraction of the monomer) and the simulated spectrum at the same level of theory as used for the monomer (red line).

**Table S2.** Reaction mechanism used for the kinetic simulation.

| $k^a$                                | Reaction                                                                                                                       | References / notes |
|--------------------------------------|--------------------------------------------------------------------------------------------------------------------------------|--------------------|
| $8.5 \times 10^{-5} \text{ s}^{-1}$  | $\text{O}_3 \rightarrow \text{O}_2 + \text{O}(^1\text{D})$                                                                     | b                  |
| $1.2 \times 10^{-10}$                | $\text{O}(^1\text{D}) + \text{H}_2 \rightarrow \text{OH} + \text{H}$                                                           | IUPAC              |
| $6.7 \times 10^{-15}$                | $\text{OH} + \text{H}_2 \rightarrow \text{H}_2\text{O} + \text{H}$                                                             | IUPAC              |
| $1 \times 10^{-12}$                  | $\text{H} + \text{O}_2 \rightarrow \text{HO}_2$                                                                                | IUPAC              |
| $2.8 \times 10^{-11}$                | $\text{H} + \text{O}_3 \rightarrow \text{OH} + \text{O}_2$                                                                     | IUPAC              |
| $1.6 \times 10^{-12}$                | $\text{HO}_2 + \text{HO}_2 \rightarrow \text{H}_2\text{O}_2 + \text{O}_2$                                                      | IUPAC              |
| $2.0 \times 10^{-15}$                | $\text{HO}_2 + \text{O}_3 \rightarrow \text{OH} + 2 \text{O}_2$                                                                | IUPAC              |
| $1.4 \times 10^{-13}$                | $\text{CH}_3\text{SO}_2\text{NH}_2 + \text{OH} \rightarrow \text{CH}_2\text{SO}_2\text{NH}_2 + \text{H}_2\text{O}$             | This work          |
| $8.3 \times 10^{-12}$                | $\text{CH}_2\text{SO}_2\text{NH}_2 + \text{O}_2 \rightarrow \text{O}_2\text{CH}_2\text{SO}_2\text{NH}_2$                       | c                  |
| $6 \times 10^{-12}$                  | $2 \text{O}_2\text{CH}_2\text{SO}_2\text{NH}_2 \rightarrow \text{O}_2 + 2 \text{OCH}_2\text{SO}_2\text{NH}_2$                  | d                  |
| $8 \times 10^{-12}$                  | $\text{O}_2\text{CH}_2\text{SO}_2\text{NH}_2 + \text{NO} \rightarrow \text{NO}_2 + \text{OCH}_2\text{SO}_2\text{NH}_2$         | e                  |
| $> 1 \times 10^9 \text{ s}^{-1}$     | $\text{OCH}_2\text{SO}_2\text{NH}_2 \rightarrow \text{CH}_2\text{O} + \text{SO}_2\text{NH}_2$                                  | f                  |
| $8.5 \times 10^{-12}$                | $\text{CH}_2\text{O} + \text{OH} \rightarrow \text{HCO} + \text{H}_2\text{O}$                                                  | IUPAC              |
| $6.5 \times 10^{-12}$                | $\text{O}_2\text{CH}_2\text{SO}_2\text{NH}_2 + \text{HO}_2 \rightarrow \text{HOCH}_2\text{SO}_2\text{NH}_2 + \text{O}_2$       | g                  |
| $6 \times 10^{-12}$                  | $\text{HOCH}_2\text{SO}_2\text{NH}_2 + \text{OH} \rightarrow \text{HOCHSO}_2\text{NH}_2 + \text{H}_2\text{O}$                  | h                  |
| $\alpha \times 1 \times 10^{15}$     | $\text{HOCHSO}_2\text{NH}_2 \rightarrow \text{HC(O)OH} + \text{SO}_2\text{NH}_2$                                               | i                  |
| $(1-\alpha) \times 1 \times 10^{15}$ | $\text{HOCHSO}_2\text{NH}_2 \rightarrow \text{OH} + \text{HC(O)SO}_2\text{NH}_2$                                               | i                  |
| $1.5 \times 10^{-11}$                | $\text{HC(O)SO}_2\text{NH}_2 + \text{OH} \rightarrow \text{C(O)SO}_2\text{NH}_2 + \text{H}_2\text{O}$                          | j                  |
| $1 \times 10^{-11}$                  | $\text{C(O)SO}_2\text{NH}_2 + \text{O}_2 + \text{M} \rightarrow \text{O}_2\text{C(O)SO}_2\text{NH}_2 + \text{M}$               | k                  |
| 0 or $1 \times 10^{10}$              | $\text{C(O)SO}_2\text{NH}_2 \rightarrow \text{CO} + \text{SO}_2\text{NH}_2$                                                    | l                  |
| $1.4 \times 10^{-11}$                | $\text{O}_2\text{C(O)SO}_2\text{NH}_2 + \text{HO}_2 \rightarrow \text{OH} + \text{CO}_2 + \text{O}_2 + \text{SO}_2\text{NH}_2$ | m                  |
| $2.01 \times 10^{-13}$               | $\text{CH}_2\text{O} + \text{OH} \rightarrow \text{HCOOH} + \text{H}$                                                          | IUPAC              |
| $5.6 \times 10^{-12}$                | $\text{HCO} + \text{O}_2 \rightarrow \text{HO}_2 + \text{CO}$                                                                  | IUPAC              |
| $1.5 \times 10^{-13}$                | $\text{CO} + \text{OH} (+\text{O}_2) \rightarrow \text{CO}_2 + \text{HO}_2$                                                    | IUPAC              |
| $500 \text{ s}^{-1}$                 | $\text{SO}_2\text{NH}_2 \rightarrow \text{SO}_2 + \text{NH}_2$                                                                 | n                  |
| $1.9 \times 10^{-13}$                | $\text{NH}_2 + \text{O}_3 \rightarrow \text{NH}_2\text{O} + \text{H}_2\text{O}$                                                | KP 1999            |
| $3.2 \times 10^{-11}$                | $\text{NH}_2 + \text{HO}_2 \rightarrow \text{NH}_2\text{O} + \text{OH}$                                                        | KP 1999            |
| $4.8 \times 10^{-12}$                | $\text{NH}_2 + \text{HO}_2 \rightarrow \text{HNO} + \text{H}_2\text{O}$                                                        | KP 1999            |
| $1.9 \times 10^{-12}$                | $\text{NH}_2 + \text{NO} \rightarrow \text{HO}_2 + \text{OH} + \text{N}_2$                                                     | KP 1999            |
| $1.41 \times 10^{-11}$               | $\text{NH}_2 + \text{NO} \rightarrow \text{H}_2\text{O} + \text{N}_2$                                                          | KP 1999            |
| $1.2 \times 10^{-11}$                | $\text{NH}_2 + \text{NO}_2 \rightarrow \text{N}_2\text{O} + \text{H}_2\text{O}$                                                | KP 1999            |
| $8 \times 10^{-12}$                  | $\text{NH}_2 + \text{NO}_2 \rightarrow \text{NH}_2\text{O} + \text{NO}$                                                        | KP 1999            |
| $1.2 \times 10^{-14}$                | $\text{NH}_2\text{O} + \text{O}_3 \rightarrow \text{NH}_2 + \text{O}_2$                                                        | KP 1999            |
| $1300 \text{ s}^{-1}$                | $\text{NH}_2\text{O} \rightarrow \text{NHOH}$                                                                                  | KP 1999            |
| $9.3 \times 10^{-15}$                | $\text{NH} + \text{O}_2 \rightarrow \text{NO} + \text{OH}$                                                                     | KP 1999            |
| $4.9 \times 10^{-11}$                | $\text{NH} + \text{NO} \rightarrow \text{OH} + \text{N}_2$                                                                     | KP 1999            |

|                                   |                                                                                 |         |
|-----------------------------------|---------------------------------------------------------------------------------|---------|
| $1.49 \times 10^{-11}$            | $\text{HNO} + \text{OH} \rightarrow \text{NO} + \text{H}_2\text{O}$             | KP 1999 |
| $1.04 \times 10^{-14}$            | $\text{HNO} + \text{NHOH} \rightarrow \text{NH}_2\text{OH} + \text{NO}$         | KP 1999 |
| $9.6 \times 10^{-12}$             | $\text{NHOH} + \text{O}_2 \rightarrow \text{HNO} + \text{HO}_2$                 | KP 1999 |
| $4.86 \times 10^{-12}$            | $\text{HONO} + \text{OH} \rightarrow \text{NO}_2 + \text{H}_2\text{O}$          | KP 1999 |
| $3.16 \times 10^{-14}$            | $\text{NH}_2\text{OH} + \text{OH} \rightarrow \text{NHOH} + \text{H}_2\text{O}$ | KP 1999 |
| $7.2 \times 10^{-21}$             | $\text{HNO} + \text{O}_2 \rightarrow \text{HO}_2 + \text{NO}$                   | KP 1999 |
| $8.5 \times 10^{-12}$             | $\text{NO} + \text{HO}_2 \rightarrow \text{NO}_2 + \text{OH}$                   | KP 1999 |
| $1.20 \times 10^{-11}$            | $\text{NO}_2 + \text{OH} \rightarrow \text{HNO}_3$                              | KP 1999 |
| $5 \times 10^{-5} \text{ s}^{-1}$ | $\text{HNO}_3 \rightarrow \text{wall}$                                          | p       |

<sup>a</sup> Units of  $\text{cm}^3 \text{ molecule}^{-1} \text{ s}^{-1}$  unless otherwise stated. Calculated for 1 bar and 298 K.

<sup>b</sup> Adjusted to match the observed loss rate of a hydrocarbon e.g. acetone during photolysis.

<sup>c</sup> Set equal to the rate constant for the reaction  $\text{CH}_3\text{CH}_2 + \text{O}_2 \rightarrow \text{CH}_3\text{CH}_2\text{O}_2$  at 1 bar.

<sup>d</sup> Set equal to the rate constant for the reaction  $2 \text{CH}_3\text{C}(\text{O})\text{CH}_2\text{OO} \rightarrow \text{O}_2 + 2 \text{CH}_3\text{C}(\text{O})\text{CH}_2\text{O}$ .

<sup>e</sup> Set equal to the rate constant for the reaction  $\text{CH}_3\text{C}(\text{O})\text{CH}_2\text{O}_2 + \text{NO} \rightarrow \text{NO}_2 + \text{CH}_3\text{C}(\text{O})\text{CH}_2\text{O}$ .

<sup>f</sup> Calculated with G4MP2 level of theory. As this is the only reaction of  $\text{OCH}_2\text{SO}_2\text{NH}_2$  that we consider, any lifetime shorter than a few seconds would give the same simulation result.

<sup>g</sup> Set equal to the rate constant for the reaction  $\text{C}_2\text{H}_5\text{O}_2 + \text{HO}_2$

<sup>h</sup> Set equal to the rate constant for the reaction  $\text{C}_2\text{H}_5\text{OOH} + \text{OH}$

<sup>i</sup> As these are the only reactions of  $\text{HOOCHSO}_2\text{NH}_2$  that we consider, any lifetime shorter than a few seconds would give the same simulation result.  $\alpha$  was varied to match the observed  $\text{HC}(\text{O})\text{OH}$  concentration.

<sup>j</sup> Set equal to the rate constant for the reaction  $\text{OH} + \text{CH}_3\text{CHO}$

<sup>k</sup> Set equal to the rate constant for the reaction  $\text{CH}_3\text{C}(\text{O}) + \text{O}_2$

<sup>l</sup> set to zero when considering reaction of  $\text{C}(\text{O})\text{SO}_2\text{NH}_2$  with  $\text{O}_2$ . At  $1 \times 10^{10} \text{ s}^{-1}$ , the reaction with  $\text{O}_2$  is insignificant.

<sup>m</sup> Set equal to the rate constant for the reaction  $\text{CH}_3\text{CO}_3 + \text{HO}_2$

<sup>n</sup> Set to the thermal decomposition rate coefficient for  $\text{CH}_3\text{SO}_2$  (see manuscript for details). Note that any value greater than  $10^{-3} \text{ s}^{-1}$  yields in the same simulation result.

<sup>p</sup> Adjusted to obtain best agreement with the observed  $\text{HNO}_3$  profile.

IUPAC: Task Group on Atmospheric Chemical Kinetic Data Evaluation, (Ammann, M., Cox, R.A., Crowley, J.N., Herrmann, H., Jenkin, M.E., McNeill, V.F., Mellouki, A., Rossi, M. J., Troe, J. and Wallington, T. J.) <http://iupac.pole-ether.fr/index.html>, 2019.

KP 1999: Kohlmann, J.-P., and Poppe, D.: The tropospheric gas-phase degradation of  $\text{NH}_3$  and its impact on the formation of  $\text{N}_2\text{O}$  and  $\text{NO}_x$ , *J. Atmos. Chem.*, 32, 397-415, 1999.

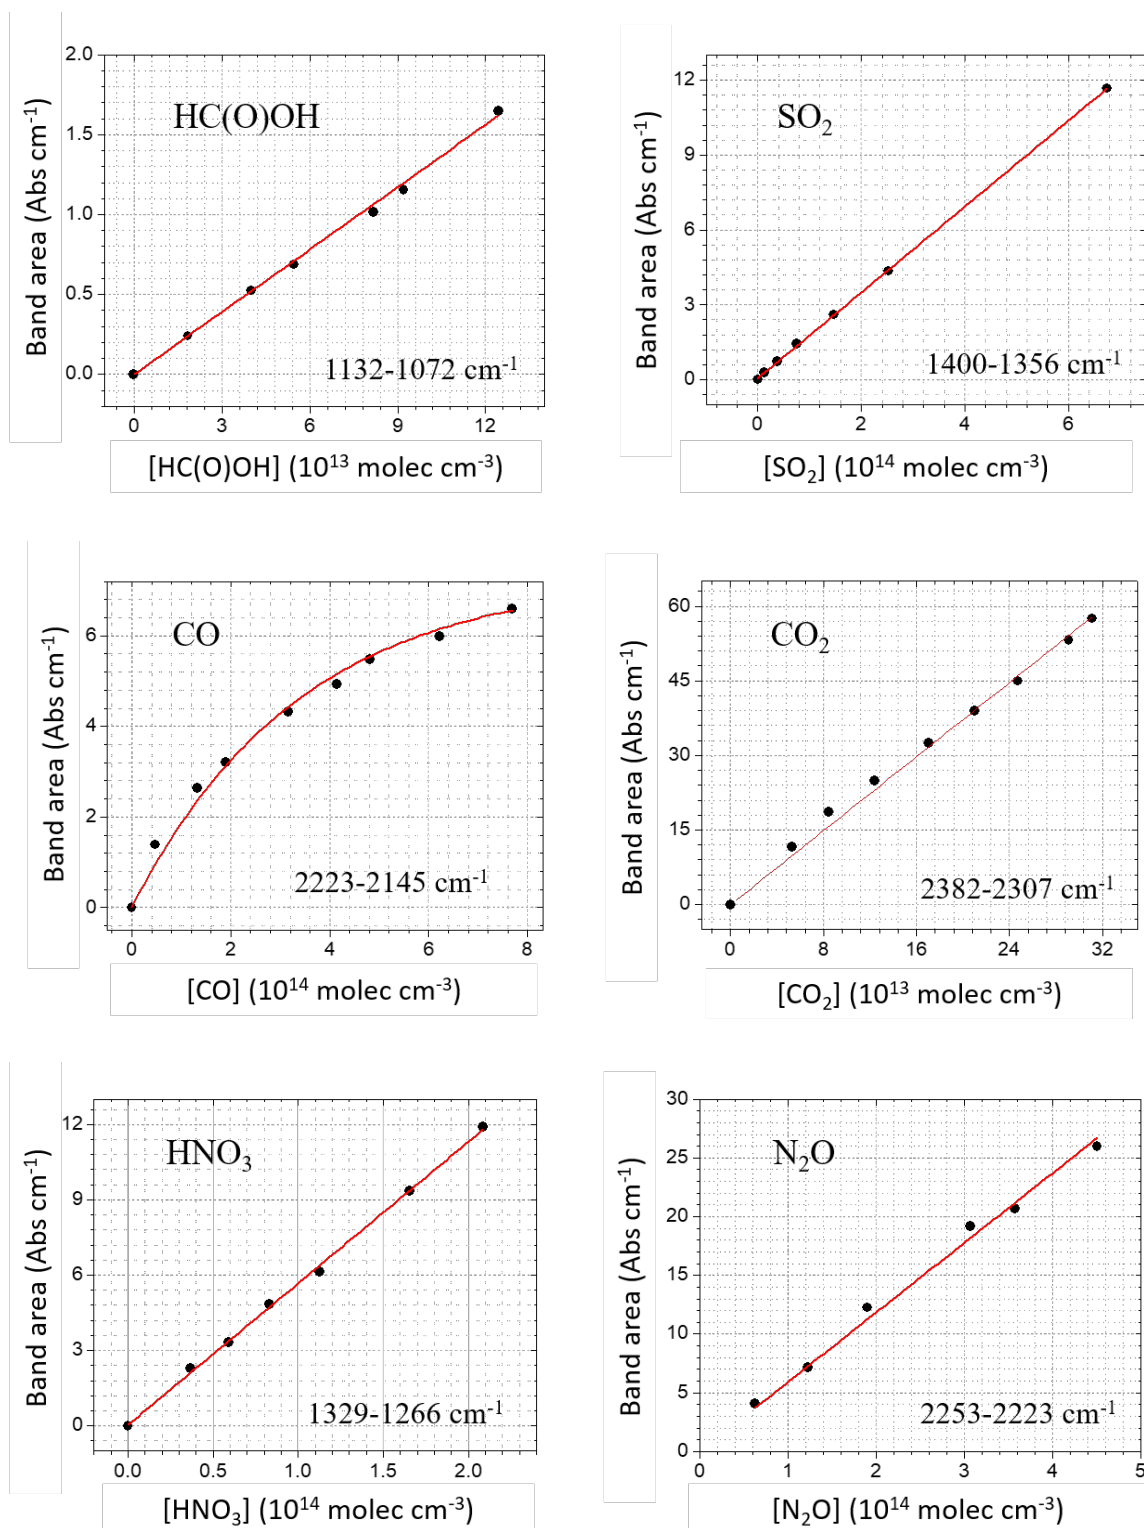

**Figure S2.** Calibration curves for the main products of the reaction  $\text{CH}_3\text{SO}_2\text{NH}_2 + \text{OH}$ . Experimental conditions were 298 K and 700 Torr synthetic air. Abs = Absorbance [ $\log_{10}(I_0/I)$ ].

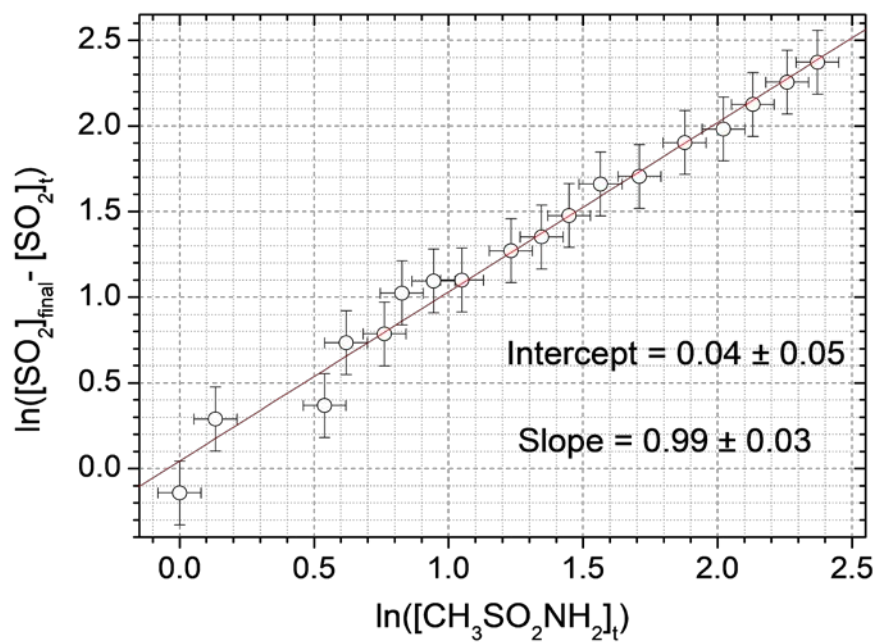

**Figure S3.** Comparison of the absorbance of  $\text{SO}_2$  product with respect to the depletion in absorbance of MSAM during oxidation.

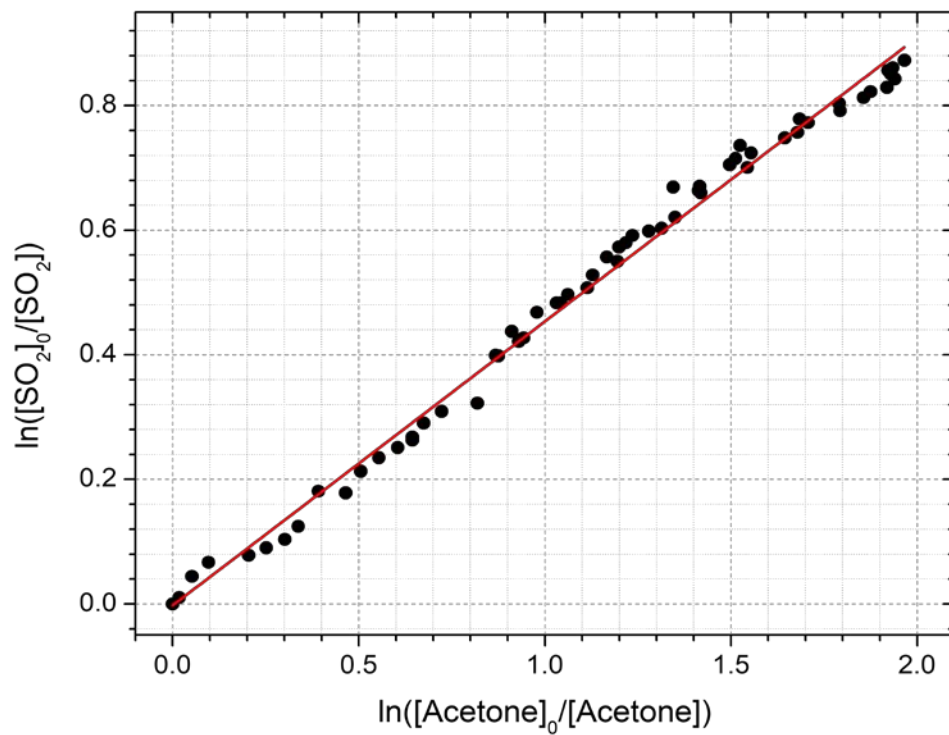

**Figure S4.** Relative rate study of OH + SO<sub>2</sub> relative to OH + CH<sub>3</sub>C(O)CH<sub>3</sub>. The experiment was conducted at a total pressure of 700 Torr air and at room temperature.



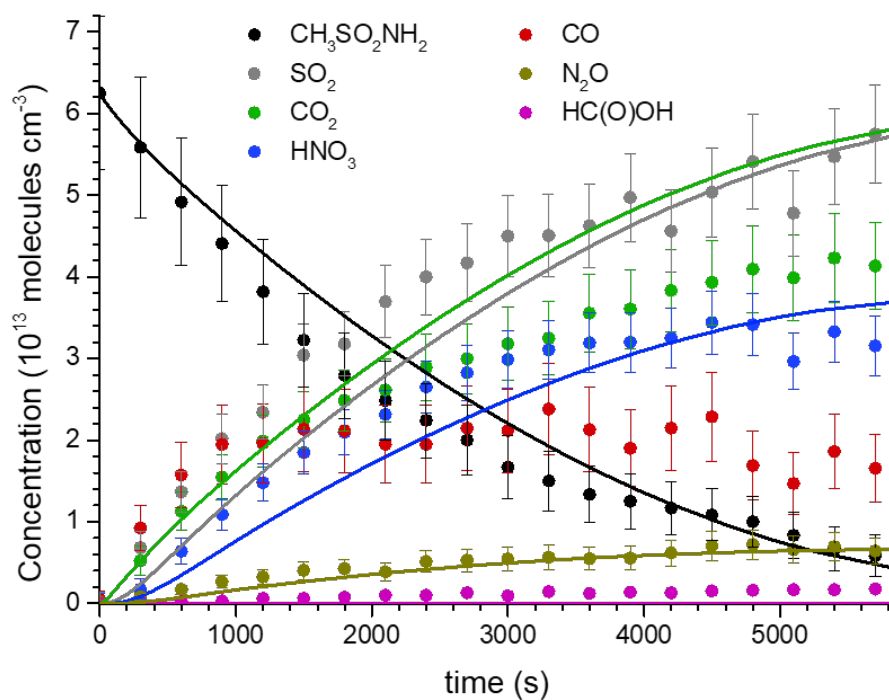

**Figure S5.** As Fig. 8 of the manuscript but with the fate of the  $\text{C(O)SO}_2\text{NH}_2$  radical modified in the simulation so that  $\text{CO}_2$  rather than  $\text{CO}$  is formed (i.e. R18-R19 are used instead of R17). Note that  $\text{CO}$  is no longer formed in measurable amounts.
